# Supplementary material for: A (μ-oxo) dicopper complex anchoring graphitized mesoporous carbon surface prepared by an in situ electrochemical method for bioinspired electrocatalytic reduction of nitrite to ammonia and sensing
Source: Royal Society of Chemistry journal article supplement (doi:10.1039/d3ta08054d), 2024-01-01
Supplement: d3ta08054d1.pdf [file d3ta08054d1.pdf]

## Supporting Figures

### **A ( $\mu$ -Oxo) Dicopper Complex Anchored Graphitized Mesoporous Carbon Surface Prepared by In-Situ Electrochemical Method for Bioinspired Electrocatalytic Reduction of Nitrite to Ammonia and Sensing**

*Sairaman Saikrithika,<sup>a,b</sup> Natarajan Saravanan<sup>a,b,#</sup>, Gabriela Almeida<sup>c,d</sup> and Annamalai Senthil Kumar<sup>a,b\*</sup>*

*<sup>a</sup>Nano and Bioelectrochemistry Research Laboratory. Carbon dioxide and Green Technology Research Centre, Vellore Institute of Technology University, Vellore – 632 014, Tamil Nadu, India*

*<sup>b</sup>Department of Chemistry, School of Advanced Sciences, Vellore Institute of Technology University, Vellore – 632 014, Tamil Nadu, India*

*<sup>c</sup>Associate Laboratory i4HB – Institute for Health and Bioeconomy; and UCIBIO – Applied Molecular Biosciences Unit, Departamento de Química, Faculdade de Ciências e Tecnologia, Universidade NOVA de Lisboa, 2829-516 Caparica, Portugal*

*<sup>d</sup>Centro de investigação interdisciplinar Egas Moniz (CiiEM), Egas Moniz School of Health and Science, Campus Universitário, Quinta da Granja, 2829-511, Caparica, Portugal*

*Corresponding Author's E-mail: askumarchem@yahoo.com and phone number; +91-416-2202754*

*<sup>#</sup>Present address: Department of Chemistry, Aringnar Anna Govt. Arts & Science College, Karaikal-609603, India.*

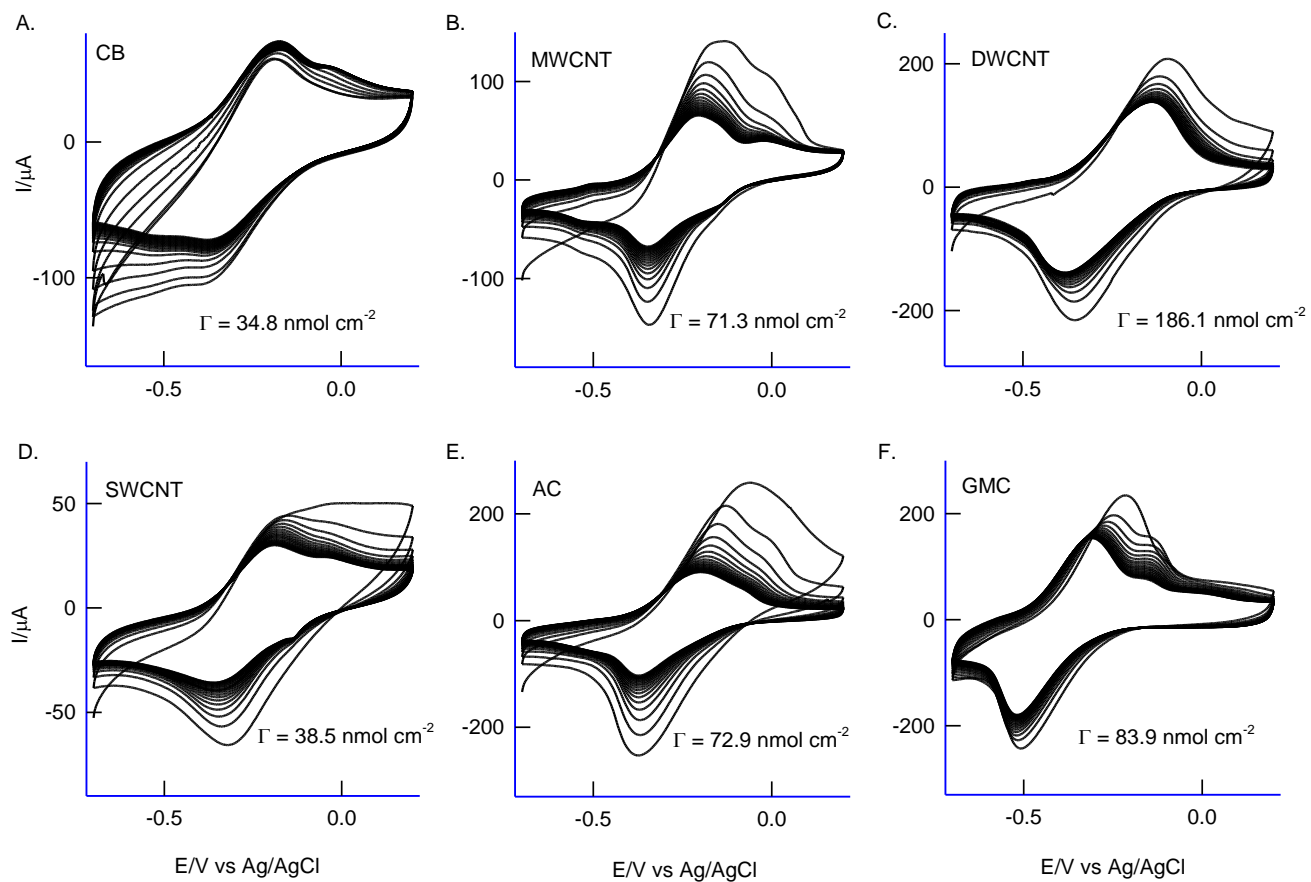

**Supporting Figure S1.** CV responses of different carbon nanomaterials (A) CB, (B) MWCNT, (C) DWCNT, (D) SWCNT, (E) AC and (F) GMC towards the formation of {Cu(BPA)Cl}-Redox in N<sub>2</sub> purged pH 7 PBS at a scan rate of 50 mV s<sup>-1</sup>.

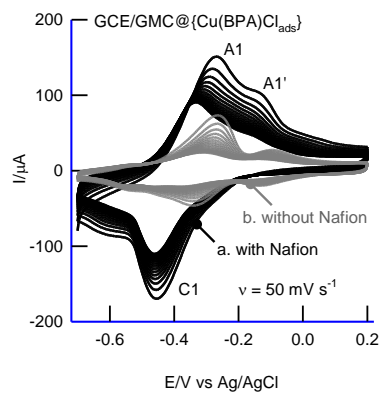

**Supporting Figure S2.** Comparative CV responses of GCE/GMC@{Cu(BPA)Cl<sub>ads</sub>} with (a) and without Nafion (b) in N<sub>2</sub> purged pH 7 PBS at a scan rate of 50 mV s<sup>-1</sup>.

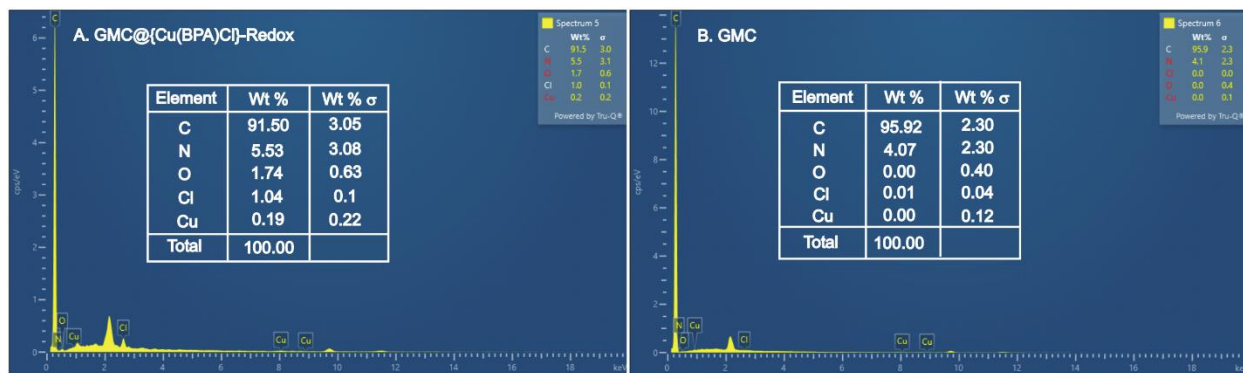

**Supporting Figure S3.**FESEM-EDAX reports of (A) GMC@Cu(BPA)Cl-Redox and (B) GMC.

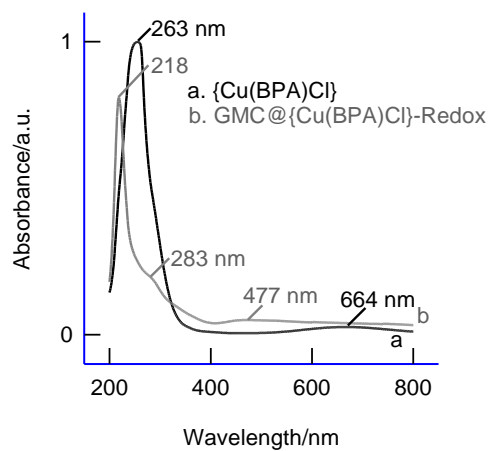

**Supporting Figure S4.** UV-vis spectral data for the {Cu(BPA)Cl} complex (curve a) and GMC@{Cu(BPA)Cl}-Redox (curve b)

**GMC@{Cu(BPA)Cl}-Redox**

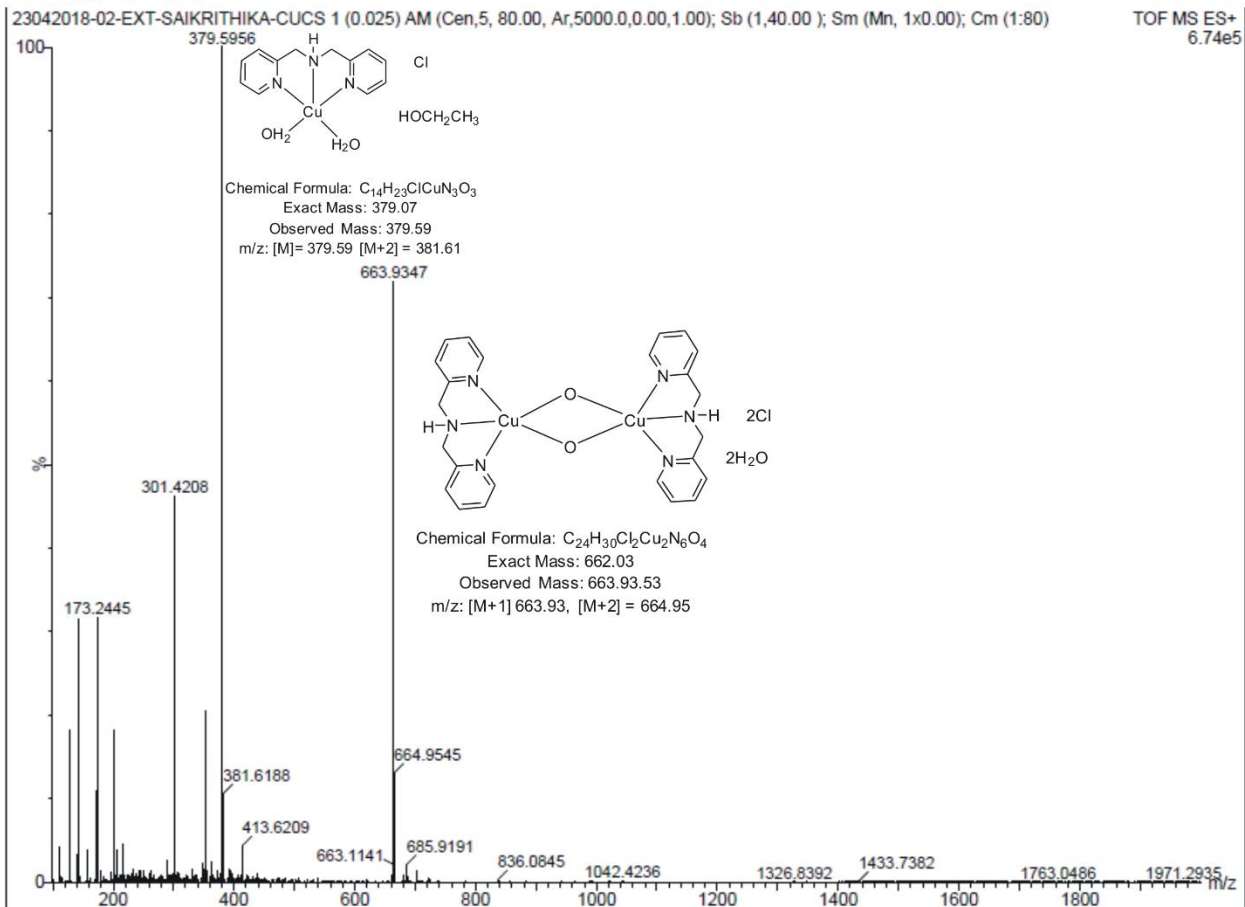

**Supporting Figure S5.** ESI-MS data of the ethanolic extract of GCE/GMC@{Cu(BPA)Cl}-Redox.

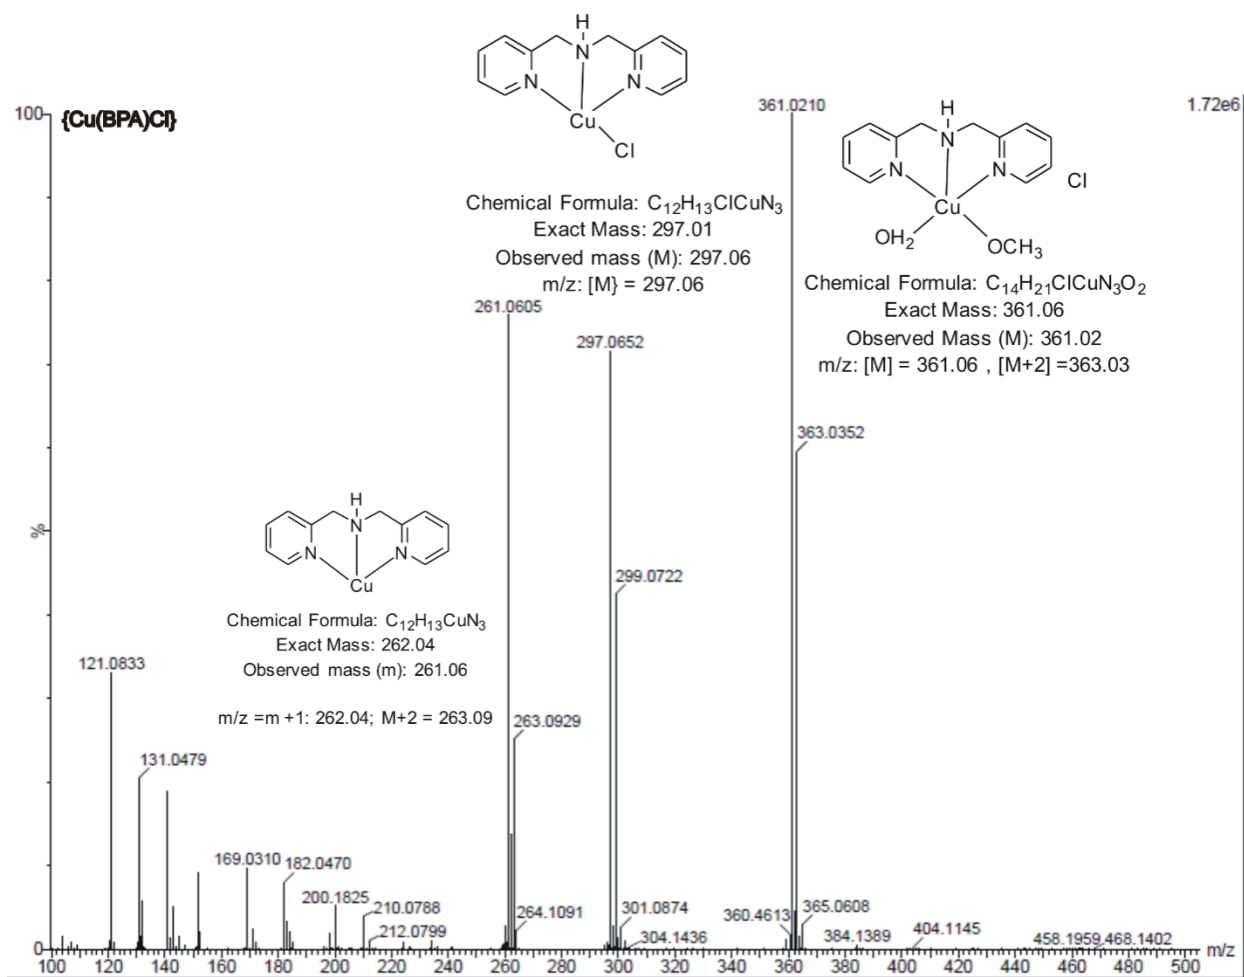

Supporting Figure S6. ESI-MS data of the ethanolic extract of {Cu(BPA)Cl}

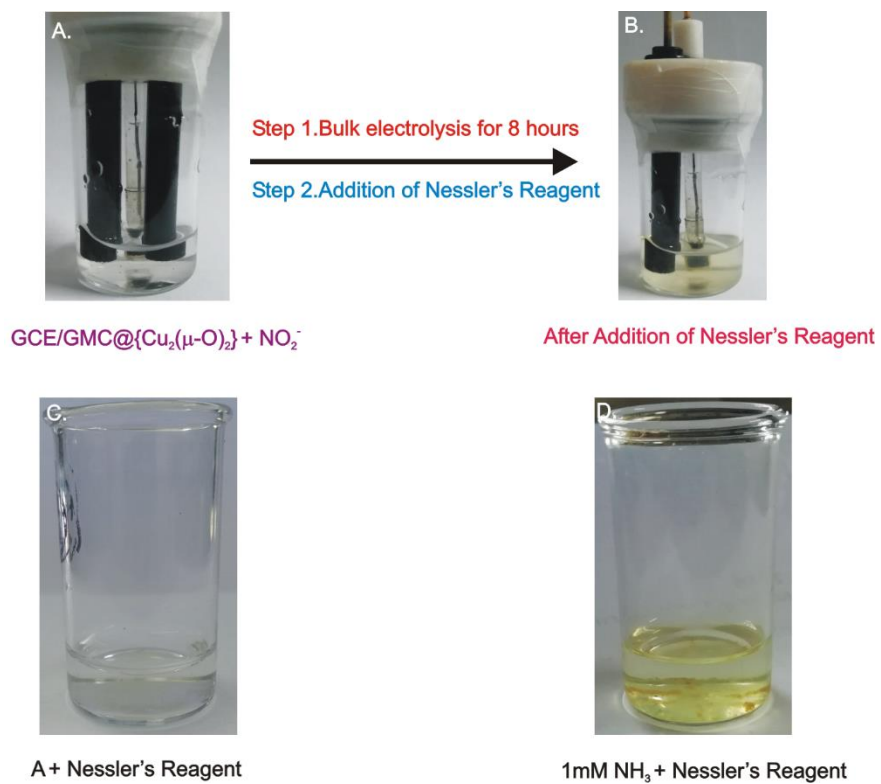

**Supporting Figure S7.** Pictures of  $\text{GCE/GMC}@{\text{Cu}_2(\text{BPA})_2(\text{NO}_2)_2(\mu\text{-O})}^{2+}$  before (A) and after (B) the addition of Nessler's reagent. Pictures of addition of Nessler's reagent to (C) before bulk electrolysis (to be added) and (D) to 1mM  $\text{NH}_3$  solution.



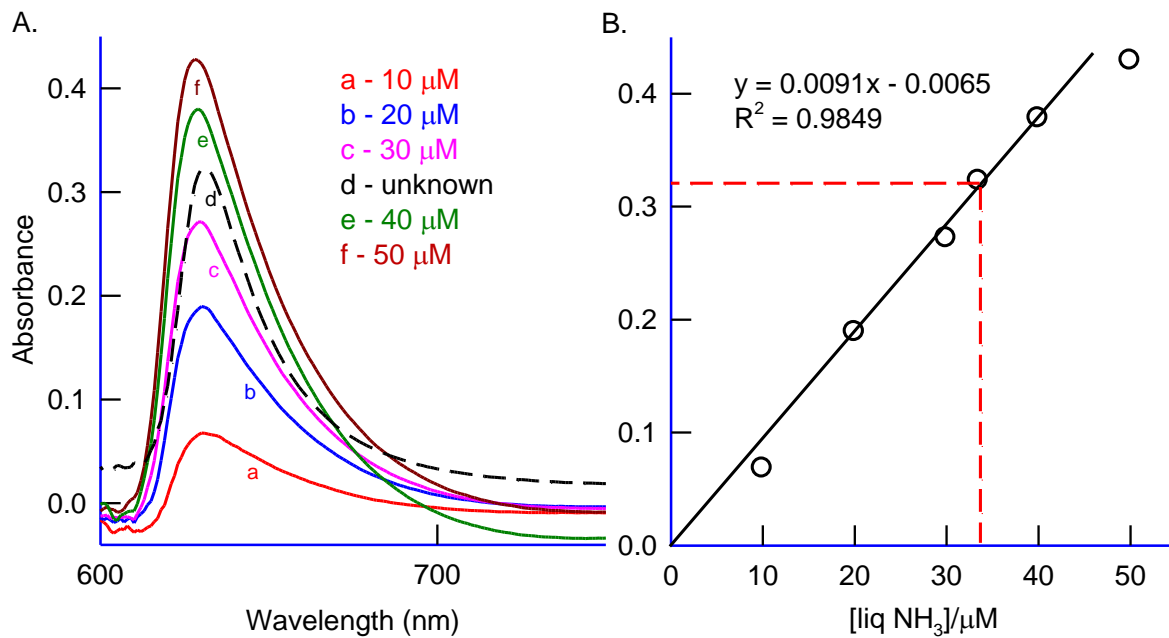

**Supporting Figure S8.** (A) Comparative UV-vis spectra of bulk electrolysis sample (unknown, curve d) and other standard NH<sub>3</sub> samples (curves a, b, c, e, f) and (B) its corresponding calibration curve for NH<sub>3</sub> quantification.

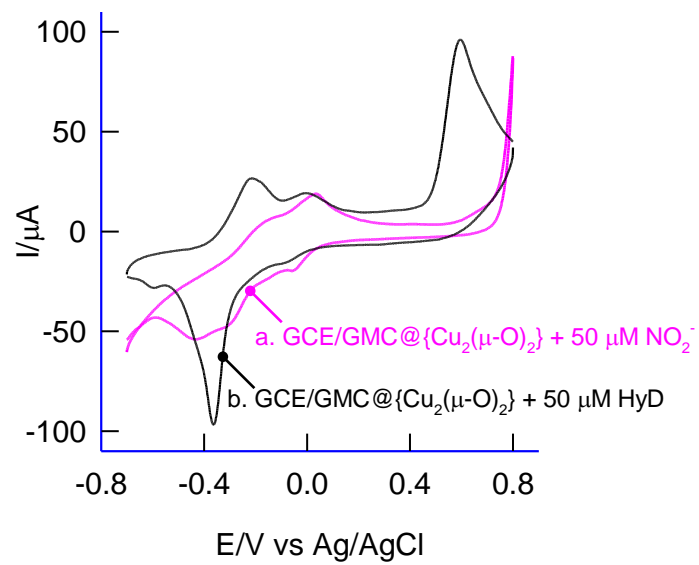

**Supporting Figure S9.** Cyclic Voltammetric responses of GCE/GMC@{Cu<sub>2</sub>(μ-O)<sub>2</sub>} with (a) 50 μM NO<sub>2</sub><sup>-</sup> and (b) 50 μM HyD at a scan rate of 10 mV s<sup>-1</sup> in N<sub>2</sub> purged pH 7 PBS.
